# Supplementary material for: Association of Facial Paralysis With Perceptions of Personality and Physical Traits
Source: PubMed Central journal article supplement (PMC7315303; doi:10.1001/jamanetworkopen.2020.5495), 2020-06-24
Supplement: jamanetwopen-3-e205495-s001.pdf [file jamanetwopen-3-e205495-s001.pdf]

## Supplementary Online Content

Parsa KM, Hancock M, Nguy PL, et al. Association of Facial Paralysis With Perceptions of Personality and Physical Traits. *JAMA Netw Open*. 2020;3(6):e205495.  
doi:10.1001/jamanetworkopen.2020.5495

**eTable.** Spearman Correlation Statistics for Social Function and Total Facial Clinimetric Evaluation Scores With Perceptions of Personality Traits

This supplementary material has been provided by the authors to give readers additional information about their work.

eTable. Spearman Correlation Statistics for Social Function and Total Facial Clinimetric Evaluation Scores With Perceptions of Personality Traits

| <b>Variable</b>        | <b>With Variable</b>   | <b>N</b> | <b>Correlation</b> | <b>Fisher's z</b> | <b>95% Confidence Limits</b> |       | <b>P-value</b> |
|------------------------|------------------------|----------|--------------------|-------------------|------------------------------|-------|----------------|
| <b>Social Function</b> | Aggressive             | 480      | -0.037             | -0.037            | -0.126                       | 0.052 | 0.41           |
|                        | Likeable               | 479      | 0.018              | 0.018             | -0.071                       | 0.108 | 0.68           |
|                        | Trustworthy            | 480      | 0.120              | 0.121             | 0.031                        | 0.207 | 0.01           |
|                        | Attractive             | 478      | 0.075              | 0.075             | -0.014                       | 0.164 | 0.09           |
|                        | Femininity/Masculinity | 366      | -0.015             | -0.015            | -0.117                       | 0.087 | 0.76           |
| <b>Total FaCE</b>      | Aggressive             | 480      | -0.032             | -0.032            | -0.121                       | 0.057 | 0.48           |
|                        | Likeable               | 479      | 0.031              | 0.030             | -0.059                       | 0.119 | 0.50           |
|                        | Trustworthy            | 480      | 0.106              | 0.106             | 0.016                        | 0.193 | 0.02           |
|                        | Attractive             | 478      | 0.091              | 0.092             | 0.002                        | 0.180 | 0.04           |
|                        | Femininity/Masculinity | 366      | 0.014              | 0.014             | -0.088                       | 0.116 | 0.78           |
